# Supplementary material
Source: PubMed Central journal article supplement (PMC7540120)
Supplement: ajtr0012-5670-f6.pdf [file ajtr0012-5670-f6.pdf]

## USP2-AS1 promotes COAD progression

**Table S1.** YAP1 binding natural antisense lncRNAs

| Gene ID         | name         | lgG_fpkm | YAP_fpkm | lgG_count | YAP_count |
|-----------------|--------------|----------|----------|-----------|-----------|
| ENST00000573447 | ZNF213-AS1   | 0        | 0.35     | 0         | 6         |
| ENST00000577163 | ZNF213-AS1   | 0        | 0.33     | 0         | 3         |
| ENST00000450834 | ZEB1-AS1     | 0        | 0.34     | 0         | 3         |
| ENST00000424191 | ZEB1-AS1     | 0        | 0.61     | 0         | 3         |
| ENST00000500970 | USP2-AS1     | 0.07     | 0.33     | 1.22      | 9         |
| ENST00000577297 | USP2-AS1     | 0        | 0.37     | 0         | 3.97      |
| ENST00000442329 | TTN-AS1      | 0        | 1.38     | 0         | 17.8      |
| ENST00000589842 | TTN-AS1      | 0        | 0.72     | 0         | 7.08      |
| ENST00000431259 | TTN-AS1      | 0        | 0.3      | 0         | 6.94      |
| ENST00000628296 | TTN-AS1      | 0        | 0.4      | 0         | 3         |
| ENST00000525151 | TRAF3IP2-AS1 | 0        | 0.74     | 0         | 7         |
| ENST00000456352 | TRAF3IP2-AS1 | 0        | 0.8      | 0         | 6         |
| ENST00000607066 | TRAF3IP2-AS1 | 0.03     | 0.45     | 0.11      | 3         |
| ENST00000504922 | TMEM161B-AS1 | 0        | 0.73     | 0         | 6.59      |
| ENST00000504769 | TMEM161B-AS1 | 0        | 0.35     | 0         | 3         |
| ENST00000521708 | THUMP3-AS1   | 0        | 7.34     | 0         | 62.37     |
| ENST00000522525 | THUMP3-AS1   | 0        | 1.61     | 0         | 46.58     |
| ENST00000519043 | THUMP3-AS1   | 0        | 2.62     | 0         | 45.23     |
| ENST00000629485 | PCBP1-AS1    | 0        | 0.56     | 0         | 6.78      |
| ENST00000625888 | PCBP1-AS1    | 0        | 0.51     | 0         | 6         |
| ENST00000625257 | PCBP1-AS1    | 0        | 0.52     | 0         | 5.26      |
| ENST00000415742 | PCBP1-AS1    | 0        | 0.55     | 0         | 4.77      |
| ENST00000594548 | PCBP1-AS1    | 0        | 0.32     | 0         | 3.42      |
| ENST00000561402 | NR2F2-AS1    | 0        | 0.6      | 0         | 5.46      |
| ENST00000560170 | NR2F2-AS1    | 0        | 0.51     | 0         | 4.34      |
| ENST00000573878 | MMP25-AS1    | 0        | 0.74     | 0         | 5.5       |
| ENST00000572574 | MMP25-AS1    | 0        | 0.33     | 0         | 4         |
| ENST00000585346 | MAP3K14-AS1  | 0        | 0.83     | 0         | 6.24      |
| ENST00000591263 | MAP3K14-AS1  | 0        | 0.67     | 0         | 4.68      |
| ENST00000477249 | LRR75A-AS1   | 0        | 3.93     | 0         | 54.24     |
| ENST00000491009 | LRR75A-AS1   | 0        | 1.6      | 0         | 21.39     |
| ENST00000470491 | LRR75A-AS1   | 0        | 0.45     | 0         | 7.34      |
| ENST00000578380 | LRR75A-AS1   | 0        | 1.46     | 0         | 7         |
| ENST00000457535 | LAMTOR5-AS1  | 0        | 0.55     | 0         | 7         |
| ENST00000597455 | LAMTOR5-AS1  | 0        | 0.32     | 0         | 4         |
| ENST00000625584 | LAMTOR5-AS1  | 0        | 0.38     | 0         | 3         |
| ENST00000455933 | CDKN2B-AS1   | 0        | 0.81     | 0         | 8.6       |
| ENST00000583719 | CDKN2B-AS1   | 0        | 0.37     | 0         | 4.92      |
| ENST00000428857 | CCNT2-AS1    | 0        | 0.38     | 0         | 3.93      |
| ENST00000392929 | CCNT2-AS1    | 0        | 0.36     | 0         | 3.07      |
| ENST00000524007 | AZIN1-AS1    | 0        | 0.64     | 0         | 5         |
| ENST00000519181 | AZIN1-AS1    | 0        | 0.48     | 0         | 3         |
| ENST00000630823 | ARRDC3-AS1   | 0        | 0.44     | 0         | 4.99      |
| ENST00000629389 | ARRDC3-AS1   | 0        | 0.61     | 0         | 4.89      |

## USP2-AS1 promotes COAD progression

**Table S2.** Survival analysis of lncRNAs

| lncRNA       | COAD      | poor Survival |
|--------------|-----------|---------------|
| ZNF213-AS1   | Down      | No            |
| ZEB1-AS1     | Down      | Yes           |
| USP2-AS1     | Up        | Yes           |
| TTN-AS1      | Down      | No            |
| TRAF3IP2-AS1 | Down      | Yes           |
| TMEM161B-AS1 | Down      | No            |
| THUMPD3-AS1  | Down      | Yes           |
| PCBP1-AS1    | Down      | No            |
| NR2F2-AS1    | Down      | No            |
| MMP25-AS1    | Down      | Yes           |
| MAP3K14-AS1  | Down      | No            |
| LRRC75A-AS1  | Up        | No            |
| LAMTOR5-AS1  | Down      | No            |
| CDKN2B-AS1   | Down      | No            |
| CCNT2-AS1    | No change | No            |
| AZIN1-AS1    | No change | No            |
| ARRDC3-AS1   | No change | No            |

## USP2-AS1 promotes COAD progression

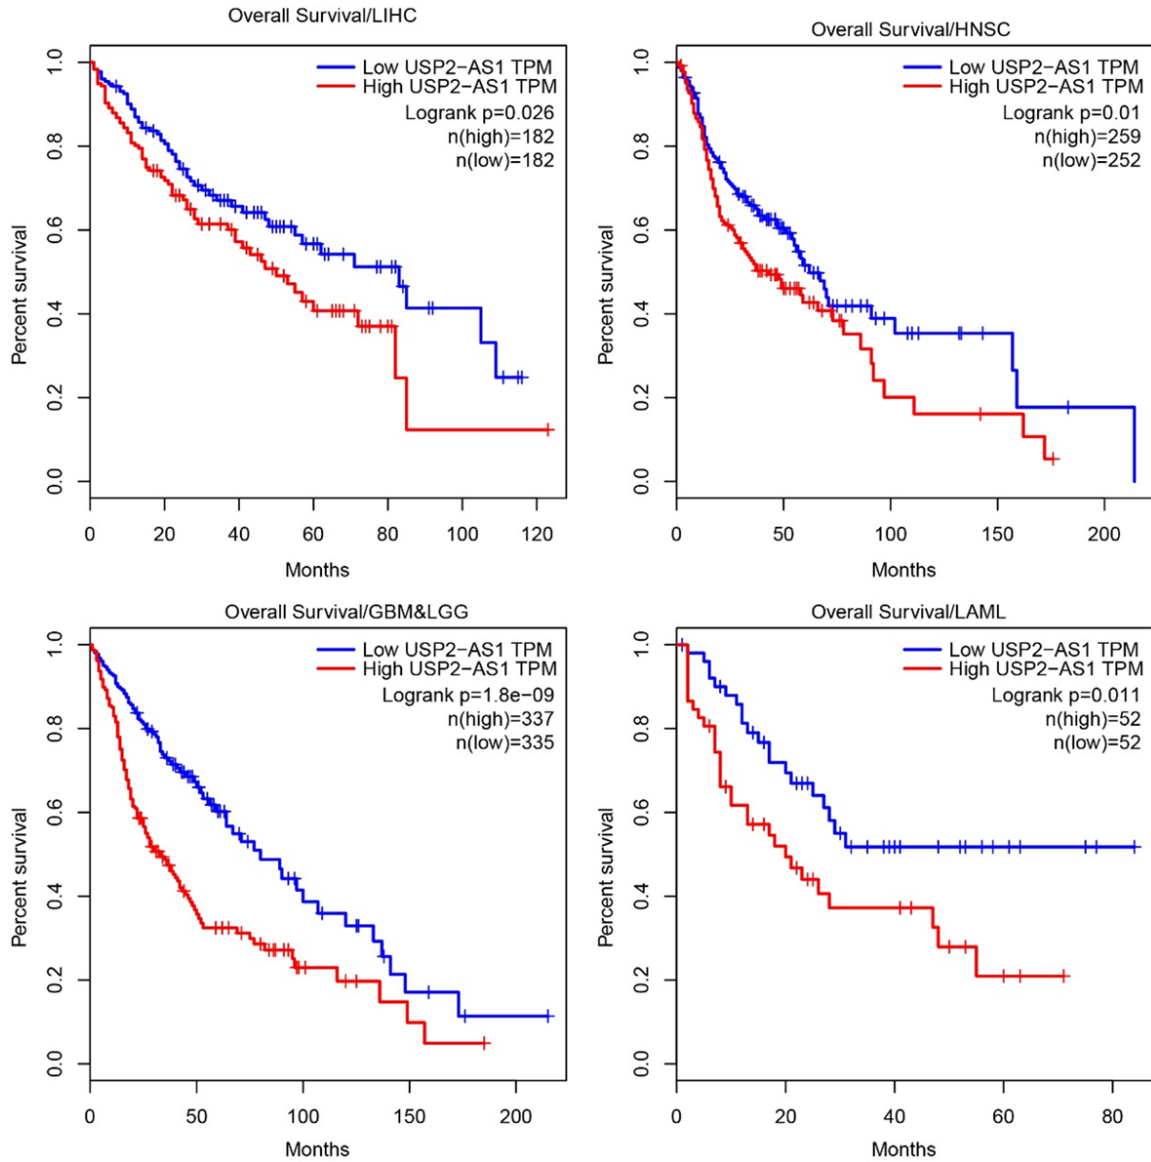

**Figure S1.** Highly expressed USP2-AS1 predicts poor prognosis in Liver cancer (LIHC), Head and Neck squamous cell carcinoma, Glioblastoma multiforme and Lower grade glioma (GBM and LGG), acute myeloid leukemia (AML).
